# Supplementary material for: Inspecting the Dangers of Feeling like a Fake: An Empirical Investigation of the Impostor Phenomenon in the World of Work
Source: PubMed Central journal article supplement (PMC5037221; doi:10.3389/fpsyg.2016.01445), 2016-09-27

## Appendix

**Table A1.**  
Validity and reliability table

| Factor                 | CR  | AVE | MSV | MaxR(H) |
|------------------------|-----|-----|-----|---------|
| External marketability | .79 | .55 | .26 | .80     |
| Impostor phenomenon    | .90 | .50 | .14 | .93     |
| Optimism               | .87 | .50 | .38 | .96     |
| Adaptability           | .90 | .57 | .29 | .97     |
| Affective commitment   | .90 | .64 | .16 | .98     |
| Career satisfaction    | .89 | .68 | .38 | .98     |
| Continuance commitment | .74 | .50 | .11 | .98     |
| Job market knowledge   | .77 | .53 | .18 | .98     |
| OCB                    | .99 | .98 | .12 | .98     |
| Internal marketability | .86 | .76 | .26 | .98     |

## The Impostor Phenomenon in the World of Work

**Table A2.**

Factor correlation matrix with square root of the AVE scores on the diagonal

| <b>Factor</b>          | External marketability | Impostor phenomenon | Optimism   | Adaptability | Affective commitment | Career satisfaction | Continuance commitment | Job market knowledge | OCB        | Internal marketability |
|------------------------|------------------------|---------------------|------------|--------------|----------------------|---------------------|------------------------|----------------------|------------|------------------------|
| External marketability | <b>.75</b>             |                     |            |              |                      |                     |                        |                      |            |                        |
| Impostor phenomenon    | -.17                   | <b>.71</b>          |            |              |                      |                     |                        |                      |            |                        |
| Optimism               | .47                    | -.37                | <b>.71</b> |              |                      |                     |                        |                      |            |                        |
| Adaptability           | .51                    | -.37                | .54        | <b>.75</b>   |                      |                     |                        |                      |            |                        |
| Affective commitment   | .06                    | -.09                | .20        | .04          | <b>.80</b>           |                     |                        |                      |            |                        |
| Career satisfaction    | .47                    | -.31                | .62        | .36          | .31                  | <b>.82</b>          |                        |                      |            |                        |
| Continuance commitment | -.28                   | .08                 | -.12       | -.30         | .34                  | .01                 | <b>.71</b>             |                      |            |                        |
| Job market knowledge   | .38                    | -.34                | .31        | .43          | -.01                 | .15                 | -.16                   | <b>.73</b>           |            |                        |
| OCB                    | .19                    | -.34                | .20        | .30          | .09                  | .21                 | -.10                   | .11                  | <b>.99</b> |                        |
| Internal marketability | .49                    | -.29                | .40        | .33          | .40                  | .51                 | -.07                   | .14                  | .18        | <b>.87</b>             |

The Impostor Phenomenon in the World of Work

**Table A3.**  
Standardized regression weights of the CFA

| Item         | Impostor<br>feelings<br>CIPS<br>(Clance, 1985) | Career<br>satisfaction<br>CS<br>(Greenhaus et al.,1990) | Internal<br>marketability<br>IM<br>(Eby et al., 2003) | Factor<br>External<br>marketability<br>EM<br>(Eby et al., 2003) | OCB<br>FELA-S<br>(Staufenbiel<br>and Hartz, 2000) | Continuance<br>commitment OCC<br>(Felfe and Franke,<br>2012) | Affective<br>commitment OCA<br>(Felfe and Franke,<br>2012) |
|--------------|------------------------------------------------|---------------------------------------------------------|-------------------------------------------------------|-----------------------------------------------------------------|---------------------------------------------------|--------------------------------------------------------------|------------------------------------------------------------|
| 1 CIPS 4     | .63                                            |                                                         |                                                       |                                                                 |                                                   |                                                              |                                                            |
| 2 CIPS 6     | .81                                            |                                                         |                                                       |                                                                 |                                                   |                                                              |                                                            |
| 3 CIPS 7     | .57                                            |                                                         |                                                       |                                                                 |                                                   |                                                              |                                                            |
| 4 CIPS 9     | .56                                            |                                                         |                                                       |                                                                 |                                                   |                                                              |                                                            |
| 5 CIPS 13    | .84                                            |                                                         |                                                       |                                                                 |                                                   |                                                              |                                                            |
| 6 CIPS 14    | .72                                            |                                                         |                                                       |                                                                 |                                                   |                                                              |                                                            |
| 7 CIPS 15    | .77                                            |                                                         |                                                       |                                                                 |                                                   |                                                              |                                                            |
| 8 CIPS 17    | .76                                            |                                                         |                                                       |                                                                 |                                                   |                                                              |                                                            |
| 9 CIPS 18    | .68                                            |                                                         |                                                       |                                                                 |                                                   |                                                              |                                                            |
| 10 CS 1      |                                                | .90                                                     |                                                       |                                                                 |                                                   |                                                              |                                                            |
| 11 CS 2      |                                                | .92                                                     |                                                       |                                                                 |                                                   |                                                              |                                                            |
| 12 CS 4      |                                                | .86                                                     |                                                       |                                                                 |                                                   |                                                              |                                                            |
| 13 CS 5      |                                                | .58                                                     |                                                       |                                                                 |                                                   |                                                              |                                                            |
| 14 IM 1      |                                                |                                                         | .84                                                   |                                                                 |                                                   |                                                              |                                                            |
| 15 IM 2      |                                                |                                                         | .90                                                   |                                                                 |                                                   |                                                              |                                                            |
| 16 EM 1      |                                                |                                                         |                                                       | .74                                                             |                                                   |                                                              |                                                            |
| 17 EM 2      |                                                |                                                         |                                                       | .69                                                             |                                                   |                                                              |                                                            |
| 18 EM 3      |                                                |                                                         |                                                       | .80                                                             |                                                   |                                                              |                                                            |
| 19 FELA-S 3  |                                                |                                                         |                                                       |                                                                 | .77                                               |                                                              |                                                            |
| 20 FELA-S 8  |                                                |                                                         |                                                       |                                                                 | .54                                               |                                                              |                                                            |
| 21 FELA-S 18 |                                                |                                                         |                                                       |                                                                 | .77                                               |                                                              |                                                            |
| 23 OCC 1     |                                                |                                                         |                                                       |                                                                 |                                                   | .72                                                          |                                                            |
| 24 OCC 2     |                                                |                                                         |                                                       |                                                                 |                                                   | .82                                                          |                                                            |
| 25 OCC 4     |                                                |                                                         |                                                       |                                                                 |                                                   | .55                                                          |                                                            |
| 26 OCA 1     |                                                |                                                         |                                                       |                                                                 |                                                   |                                                              | .78                                                        |
| 27 OCA 2     |                                                |                                                         |                                                       |                                                                 |                                                   |                                                              | .86                                                        |
| 28 OCA 3     |                                                |                                                         |                                                       |                                                                 |                                                   |                                                              | .86                                                        |
| 29 OCA 4     |                                                |                                                         |                                                       |                                                                 |                                                   |                                                              | .79                                                        |
| 30 OCA 5     |                                                |                                                         |                                                       |                                                                 |                                                   |                                                              | .71                                                        |

**Table A4.**

## Standardized regression weights of the CFA

| Item      | Factor                                            |                                                |                                                 |
|-----------|---------------------------------------------------|------------------------------------------------|-------------------------------------------------|
|           | Adapability<br>CFI<br>(Spurk and Volmer,<br>2013) | Optimism<br>CFI<br>(Spurk and Volmer,<br>2013) | Knowledge<br>CFI<br>(Spurk and Volmer,<br>2013) |
| 31 CFI 1  | .68                                               |                                                |                                                 |
| 32 CFI 2  | .74                                               |                                                |                                                 |
| 33 CFI 3  | .73                                               |                                                |                                                 |
| 34 CFI 4  | .80                                               |                                                |                                                 |
| 35 CFI 5  | .83                                               |                                                |                                                 |
| 36 CFI 6  | .79                                               |                                                |                                                 |
| 37 CFI 7  | .68                                               |                                                |                                                 |
| 38 CFI 12 |                                                   | .66                                            |                                                 |
| 39 CFI 15 |                                                   | .70                                            |                                                 |
| 40 CFI 16 |                                                   | .66                                            |                                                 |
| 41 CFI 17 |                                                   | .70                                            |                                                 |
| 42 CFI 21 |                                                   | .76                                            |                                                 |
| 43 CFI 22 |                                                   | .63                                            |                                                 |
| 44 CFI 23 |                                                   |                                                | .85                                             |
| 45 CFI 24 |                                                   |                                                | .77                                             |
| 46 CFI 25 |                                                   |                                                | .54                                             |

The Impostor Phenomenon in the World of Work

**Table A5.**  
Adjusted correlations for the main variables using marker-variable corrections

| Variable                                   | 1                 | 2                  | 3                  | 4                  | 5                 | 6                 | 7                 | 8                 | 9                 | 10                | 11                | 12                | 13                | 14    |
|--------------------------------------------|-------------------|--------------------|--------------------|--------------------|-------------------|-------------------|-------------------|-------------------|-------------------|-------------------|-------------------|-------------------|-------------------|-------|
| 1 Impostor feelings                        | (.90)             |                    |                    |                    |                   |                   |                   |                   |                   |                   |                   |                   |                   |       |
| 2 Career satisfaction                      | -.29***           | (.88)              |                    |                    |                   |                   |                   |                   |                   |                   |                   |                   |                   |       |
|                                            | 4.62 <sup>a</sup> |                    |                    |                    |                   |                   |                   |                   |                   |                   |                   |                   |                   |       |
| 3 Job satisfaction                         | -.27***           | .52***             | –                  |                    |                   |                   |                   |                   |                   |                   |                   |                   |                   |       |
|                                            | 4.27 <sup>a</sup> | 9.31 <sup>a</sup>  |                    |                    |                   |                   |                   |                   |                   |                   |                   |                   |                   |       |
| 4 Other-referent subjective career success | -.34***           | .61***             | .34***             | (.67***)           |                   |                   |                   |                   |                   |                   |                   |                   |                   |       |
|                                            | 5.52 <sup>a</sup> | 11.78 <sup>a</sup> | 5.52 <sup>a</sup>  |                    |                   |                   |                   |                   |                   |                   |                   |                   |                   |       |
| 5 Internal marketability                   | -.28***           | .46***             | .41***             | .40***             | (.76***)          |                   |                   |                   |                   |                   |                   |                   |                   |       |
|                                            | 4.45 <sup>a</sup> | 7.92 <sup>a</sup>  | 6.87 <sup>a</sup>  | 6.67 <sup>a</sup>  |                   |                   |                   |                   |                   |                   |                   |                   |                   |       |
| 6 External marketability                   | -.15*             | .41***             | .23***             | .41***             | .38***            | (.79)             |                   |                   |                   |                   |                   |                   |                   |       |
|                                            | 2.30 <sup>a</sup> | 6.87 <sup>a</sup>  | 3.60 <sup>a</sup>  | 6.87 <sup>a</sup>  | 6.27 <sup>a</sup> |                   |                   |                   |                   |                   |                   |                   |                   |       |
| 7 Salary                                   | -.25***           | .21***             | .23***             | .35***             | .21**             | .27***            | –                 |                   |                   |                   |                   |                   |                   |       |
|                                            | 3.93 <sup>a</sup> | 3.27 <sup>a</sup>  | 3.60 <sup>a</sup>  | 5.70 <sup>a</sup>  | 3.27 <sup>a</sup> | 4.27 <sup>a</sup> |                   |                   |                   |                   |                   |                   |                   |       |
| 8 Promotions                               | -.13*             | .25***             | .16*               | .24***             | .19**             | .23***            | .53***            | –                 |                   |                   |                   |                   |                   |       |
|                                            | 1.98 <sup>a</sup> | 3.93 <sup>a</sup>  | 2.46 <sup>a</sup>  | 3.76 <sup>a</sup>  | 2.94 <sup>a</sup> | 3.60 <sup>a</sup> | 9.56 <sup>a</sup> |                   |                   |                   |                   |                   |                   |       |
| 9 Organizational citizenship behavior      | -.38***           | .21**              | .19**              | .14*               | .17**             | .18**             | .16*              | .19**             | (.74)             |                   |                   |                   |                   |       |
|                                            | 6.27 <sup>a</sup> | 3.27 <sup>a</sup>  | 2.94 <sup>a</sup>  | 2.14 <sup>a</sup>  | 2.62 <sup>a</sup> | 2.78 <sup>a</sup> | 2.46 <sup>a</sup> | 2.94 <sup>a</sup> |                   |                   |                   |                   |                   |       |
| 10 Continuance commitment                  | .06               | -.001              | .11                | -.002              | -.05              | -.23***           | -.02              | -.06              | -.15*             | (.73)             |                   |                   |                   |       |
|                                            | 0.89 <sup>a</sup> | 0.02 <sup>a</sup>  | 1.67 <sup>a</sup>  | 0.00 <sup>a</sup>  | 0.74 <sup>a</sup> | 3.60 <sup>a</sup> | 0.28 <sup>a</sup> | 0.89 <sup>a</sup> | 2.30 <sup>a</sup> |                   |                   |                   |                   |       |
| 11 Affective commitment                    | -.08              | .28***             | .56***             | .11                | .35***            | .02               | .11               | .07               | .09               | .33***            | (.90)             |                   |                   |       |
|                                            | 1.20 <sup>a</sup> | 4.45 <sup>a</sup>  | 10.34 <sup>a</sup> | 1.67 <sup>a</sup>  | 5.70 <sup>a</sup> | 0.28 <sup>a</sup> | 1.67 <sup>a</sup> | 1.05 <sup>a</sup> | 1.36 <sup>a</sup> | 5.33 <sup>a</sup> |                   |                   |                   |       |
| 12 Optimism                                | -.36***           | .60***             | .37***             | .57***             | .37***            | .39***            | .13*              | .13*              | .20**             | -.09              | .19**             | (.87)             |                   |       |
|                                            | 5.89 <sup>a</sup> | 11.47 <sup>a</sup> | 6.08 <sup>a</sup>  | 10.61 <sup>a</sup> | 6.08 <sup>a</sup> | 6.47 <sup>a</sup> | 1.98 <sup>a</sup> | 1.98 <sup>a</sup> | 3.10 <sup>a</sup> | 1.36 <sup>a</sup> | 2.94 <sup>a</sup> |                   |                   |       |
| 13 Adaptability                            | -.34***           | .37***             | .23***             | .36***             | .29***            | .44***            | .27***            | .27***            | .31***            | -.26**            | .02               | .46***            | (.90)             |       |
|                                            | 5.52 <sup>a</sup> | 6.08 <sup>a</sup>  | 3.60 <sup>a</sup>  | 5.89 <sup>a</sup>  | 4.62 <sup>a</sup> | 7.49 <sup>a</sup> | 4.27 <sup>a</sup> | 4.27 <sup>a</sup> | 4.97 <sup>a</sup> | 4.10 <sup>a</sup> | 0.28 <sup>a</sup> | 7.92 <sup>a</sup> |                   |       |
| 14 Knowledge of the job market             | -.30***           | .15*               | .04                | .28***             | .12               | .33***            | .30***            | .22**             | .10               | -.11              | -.02              | .25***            | .38***            | (.75) |
|                                            | 4.80 <sup>a</sup> | 2.30 <sup>a</sup>  | 0.58 <sup>a</sup>  | 4.45 <sup>a</sup>  | 1.83 <sup>a</sup> | 5.33 <sup>a</sup> | 4.80 <sup>a</sup> | 3.43 <sup>a</sup> | 1.51 <sup>a</sup> | 1.67 <sup>a</sup> | 0.28 <sup>a</sup> | 3.93 <sup>a</sup> | 6.27 <sup>a</sup> |       |

Note. N = 238 (57% female, 43% male). Entries in parentheses on the diagonal are Cronbach's alpha reliability coefficients.

<sup>a</sup>t-statistic calculated using Equation (2) (Malhotra et al., 2006, p. 1868)

\* p < .05. \*\* p < .01. \*\*\* p < .001.

## Figure legends

**Figure A1.** Significant specific indirect effects of the impostor phenomenon on employee-relevant subjective (A) and economic (B) outcomes through self-management factors.

**Figure A2.** Significant specific indirect effects of the impostor phenomenon on organizationally relevant outcomes through self-management factors.

**Figure A3.** Results of serial mediation analysis showing that the impostor phenomenon reduced career adaptability, which is positively related to perceived external marketability and in turn reduces continuance commitment.

**Figure A4.** Results of serial mediation analysis showing that the impostor phenomenon reduces career adaptability, which is needed for high internal marketability and in turn fosters high salary.

**Figure A5.** Results of serial mediation analysis showing that the impostor phenomenon reduced job market knowledge, which is needed for high external marketability and in turn fosters high salary.

Figure A1.

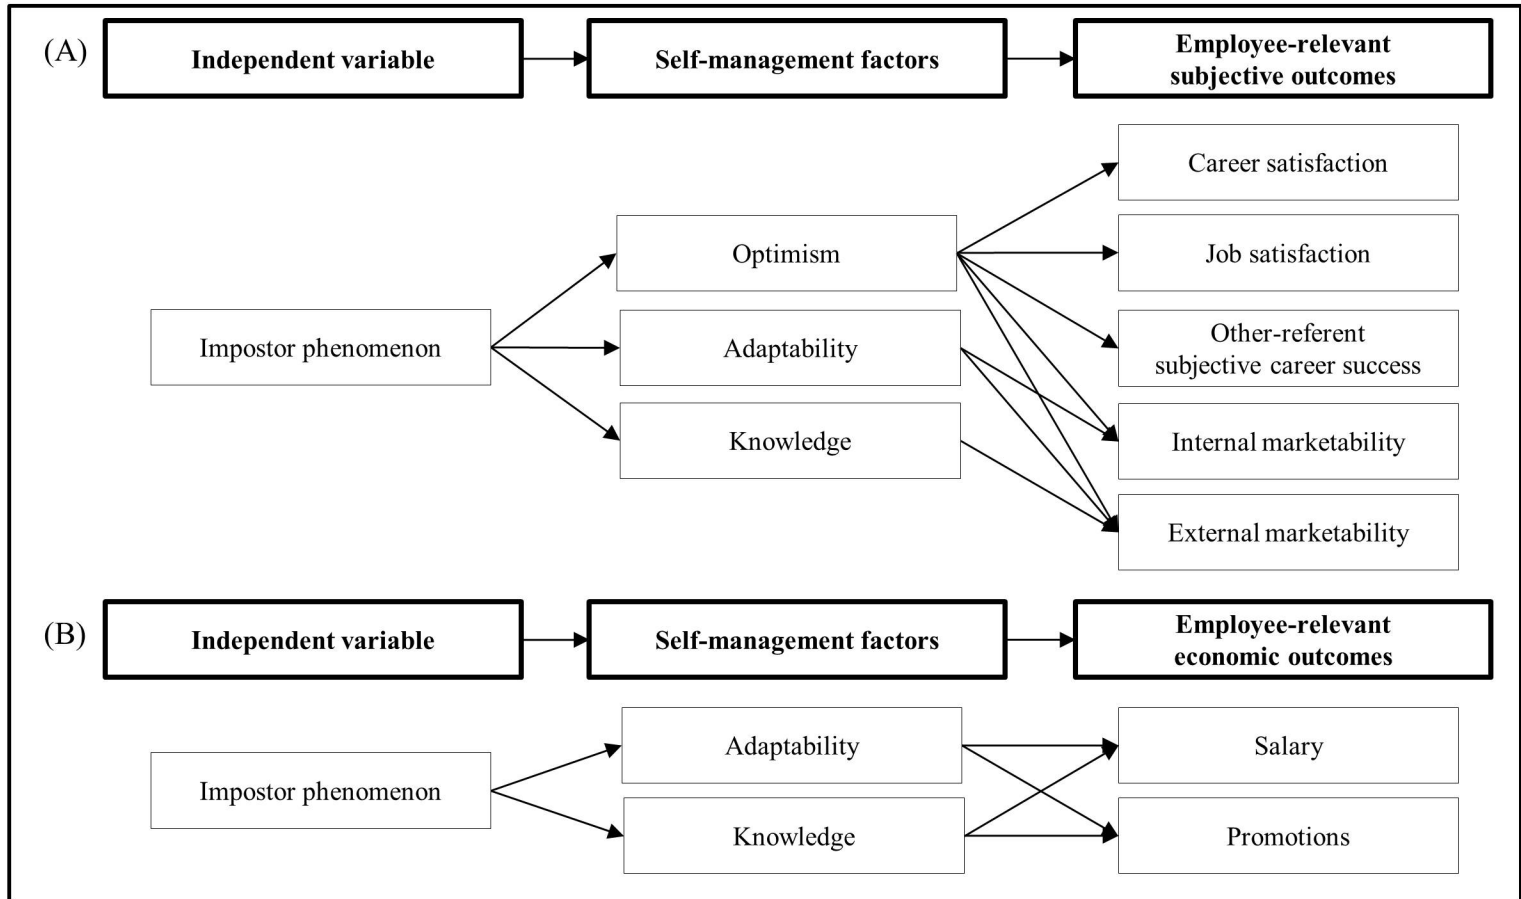

Figure A2.

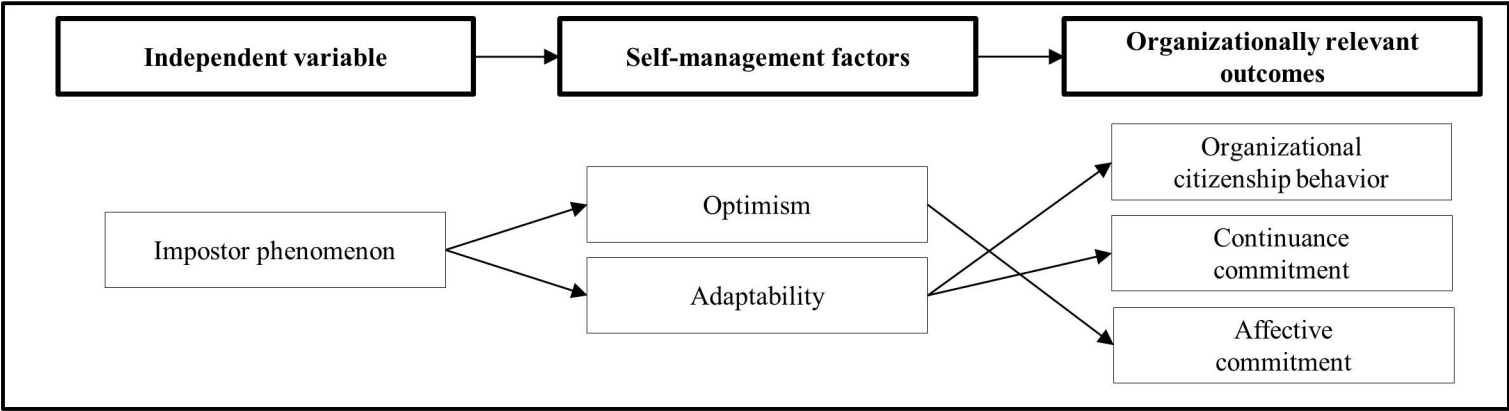



Figure A3.

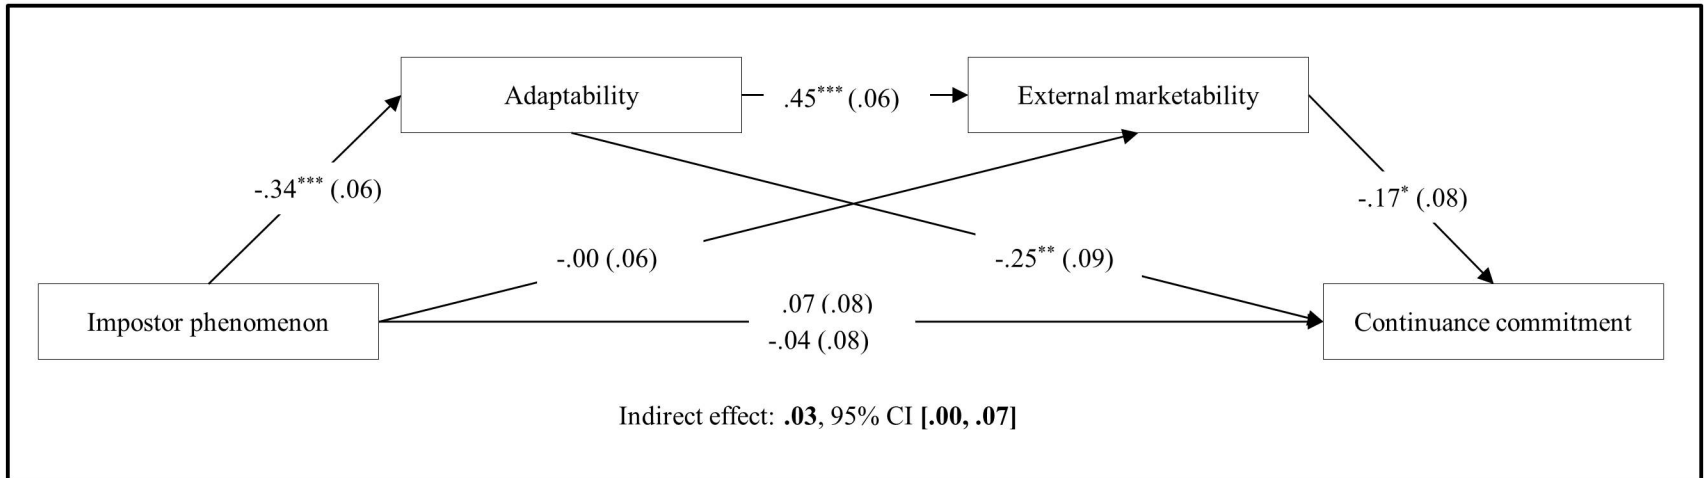

Figure A4.

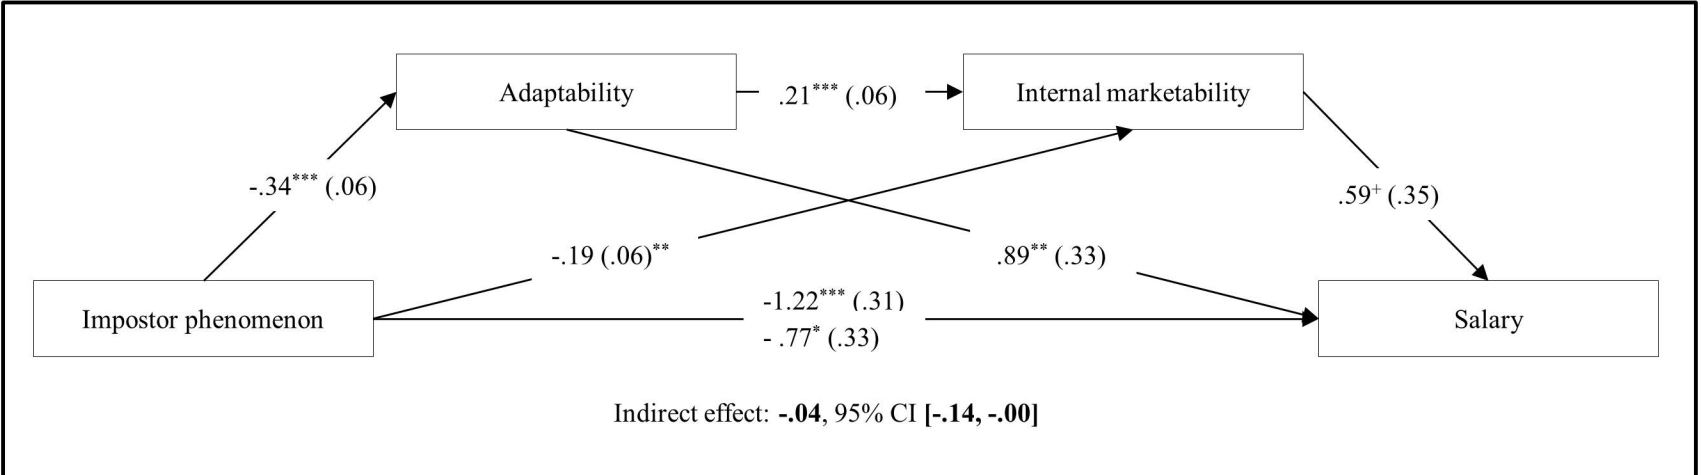

Figure A5.

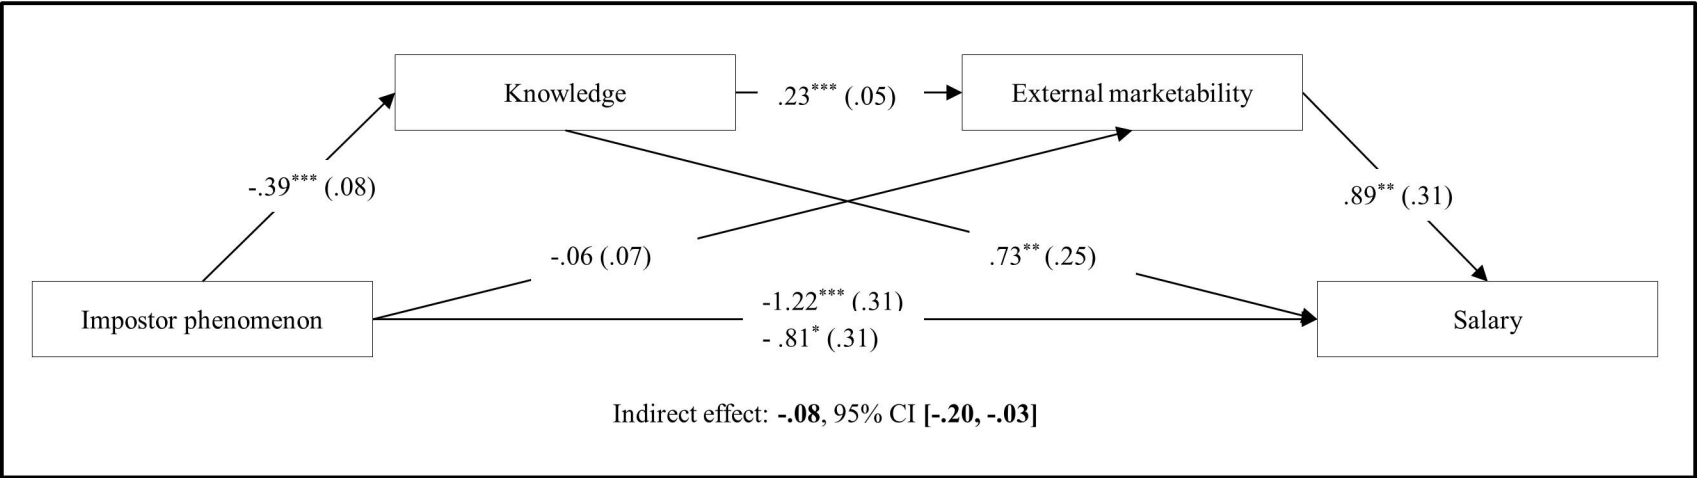

Supplement: Appendix.pdf [file Appendix.pdf]
